# Supplementary material for: Modulating acid sites in Y zeolite for valorisation of furfural to get γ-valerolactone
Source: Royal Society of Chemistry journal article supplement (doi:10.1039/d4ra03113j), 2024-01-01
Supplement: d4ra03113j1.pdf [file d4ra03113j1.pdf]

## Supporting Information

### **Modulating acid sites in Y zeolite for valorisation of furfural to get $\gamma$ -valerolactone**

*Malu Thayil Jayakumari and Kanakkampalayam Krishnan Cheralathan\**

Department of Chemistry, School of Advanced Sciences

VIT University, Vellore, 632014, India

Email: [Cheralathan.k@vit.ac.in](mailto:Cheralathan.k@vit.ac.in)

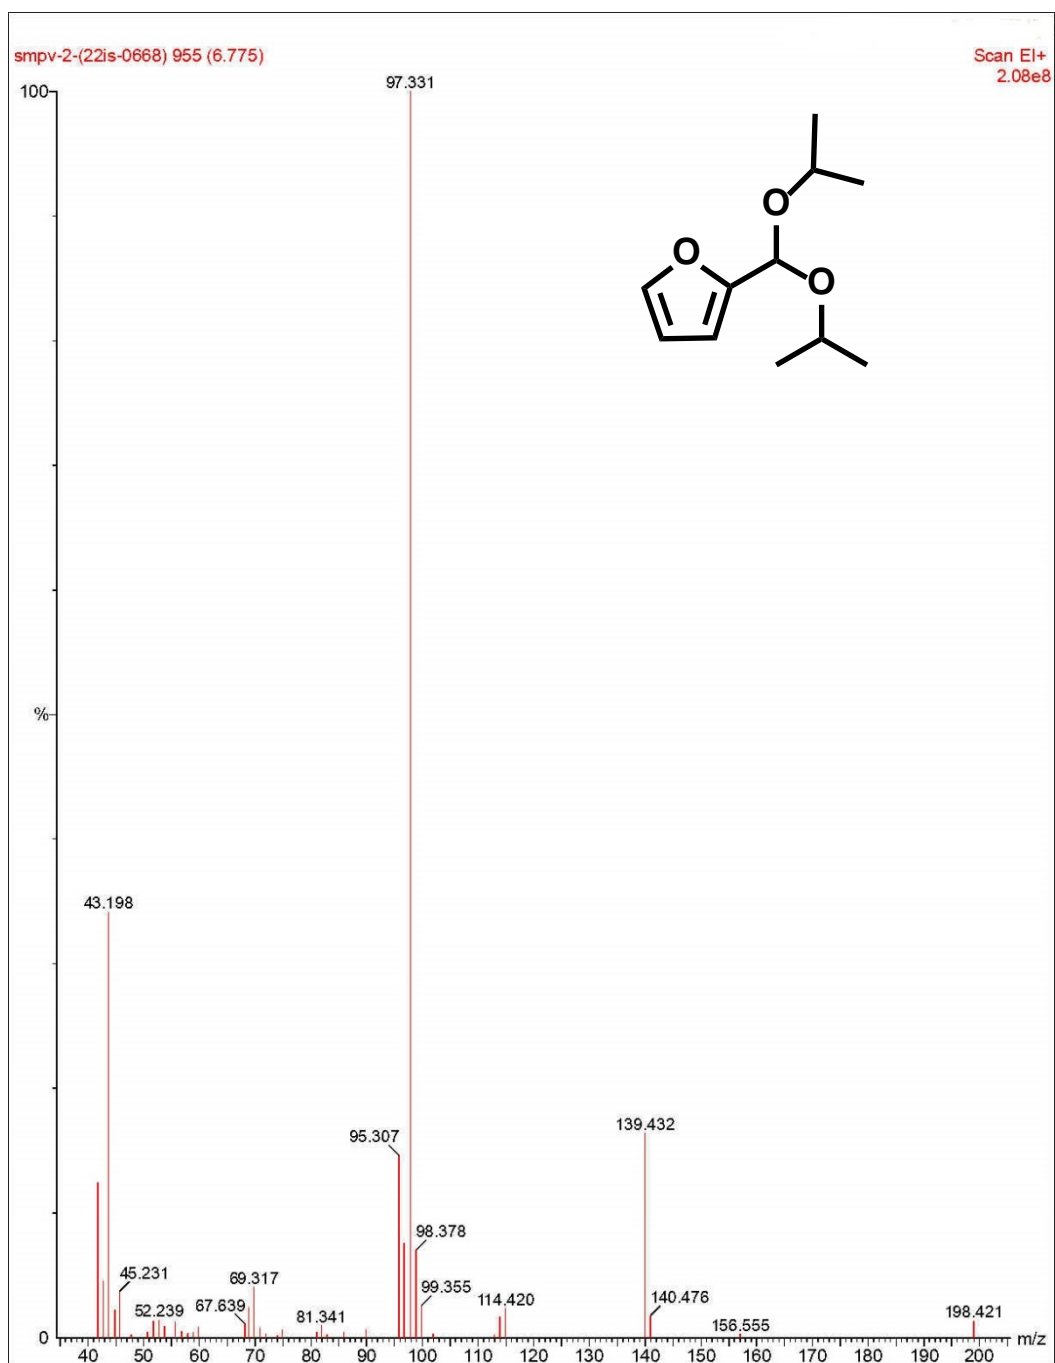

Figure S1. Mass spectrum of FDPA obtained using GC-MS

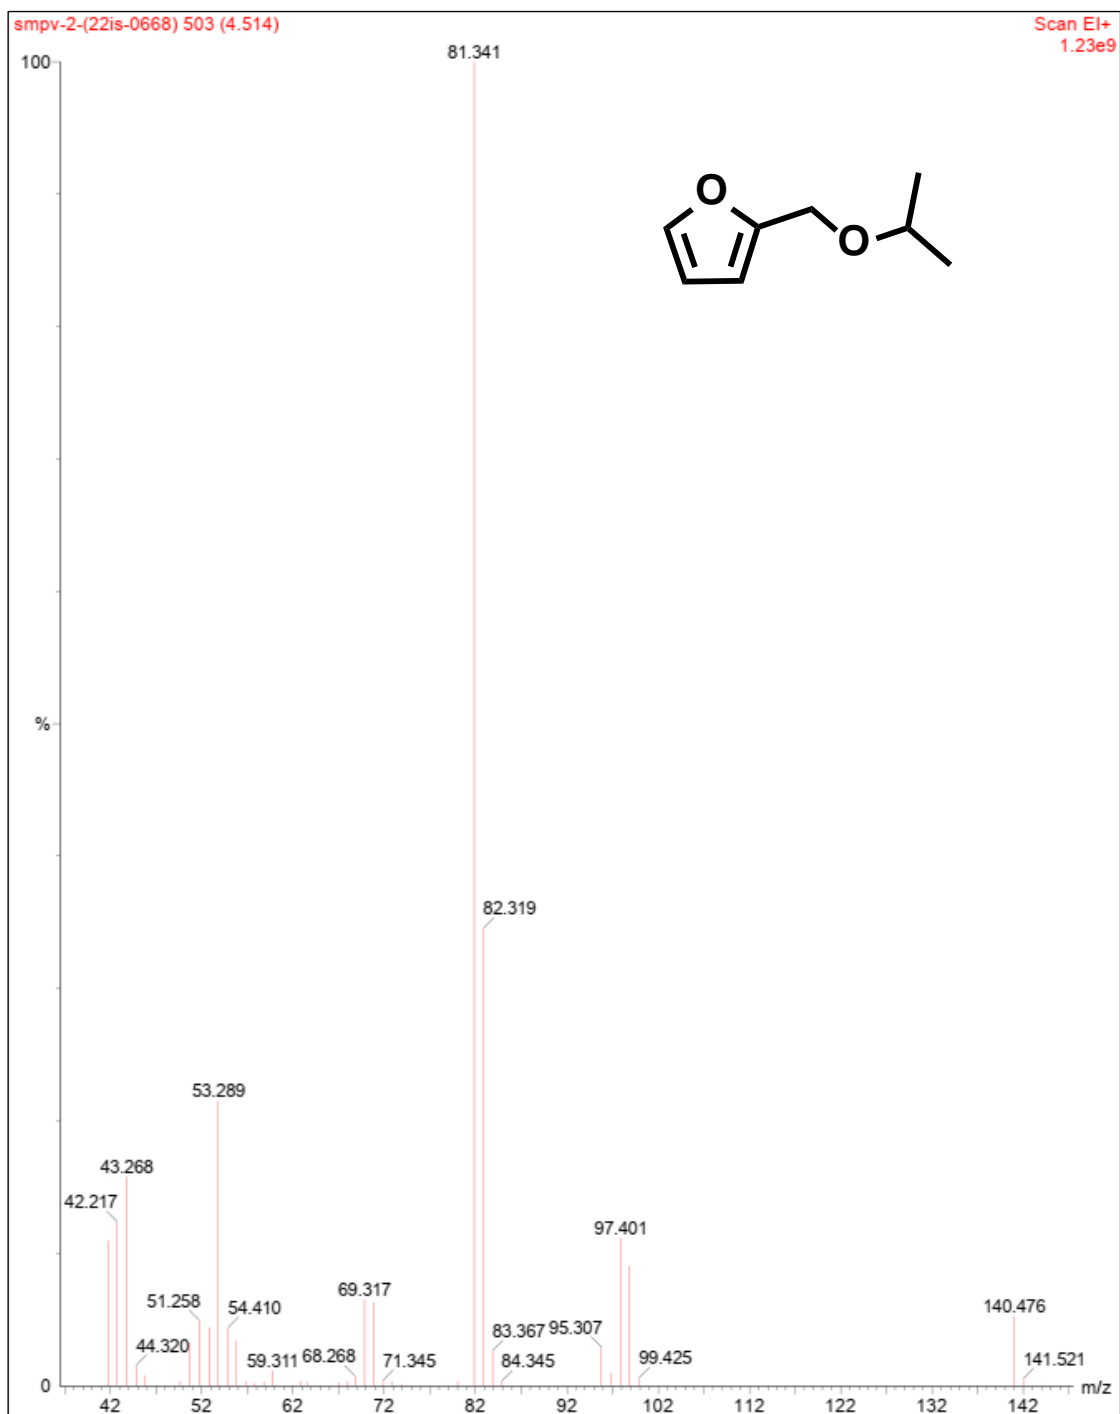

Figure S2. Mass spectrum of IPFE obtained using GC-MS

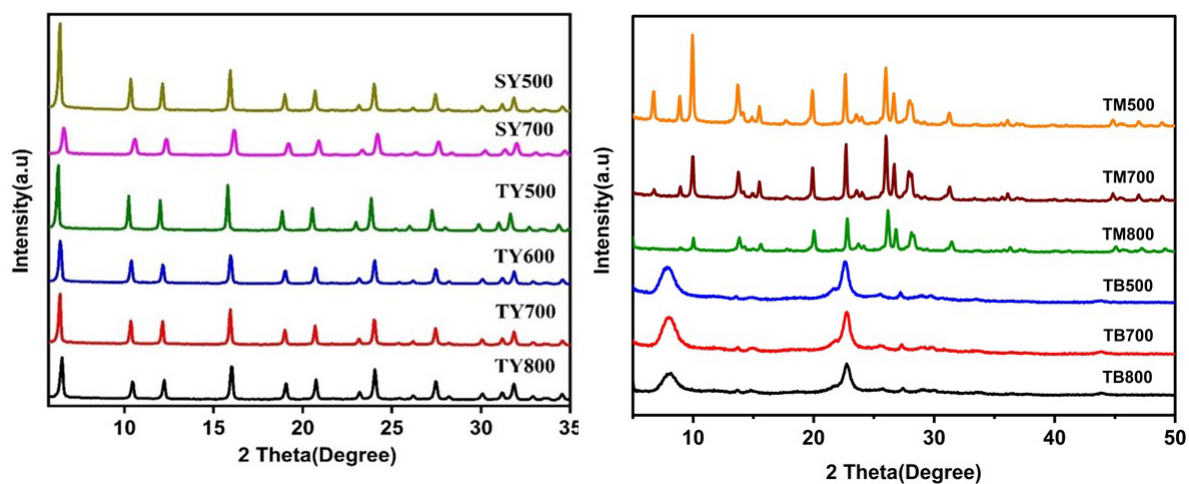

Figure S3: XRD Patterns of prepared catalysts.

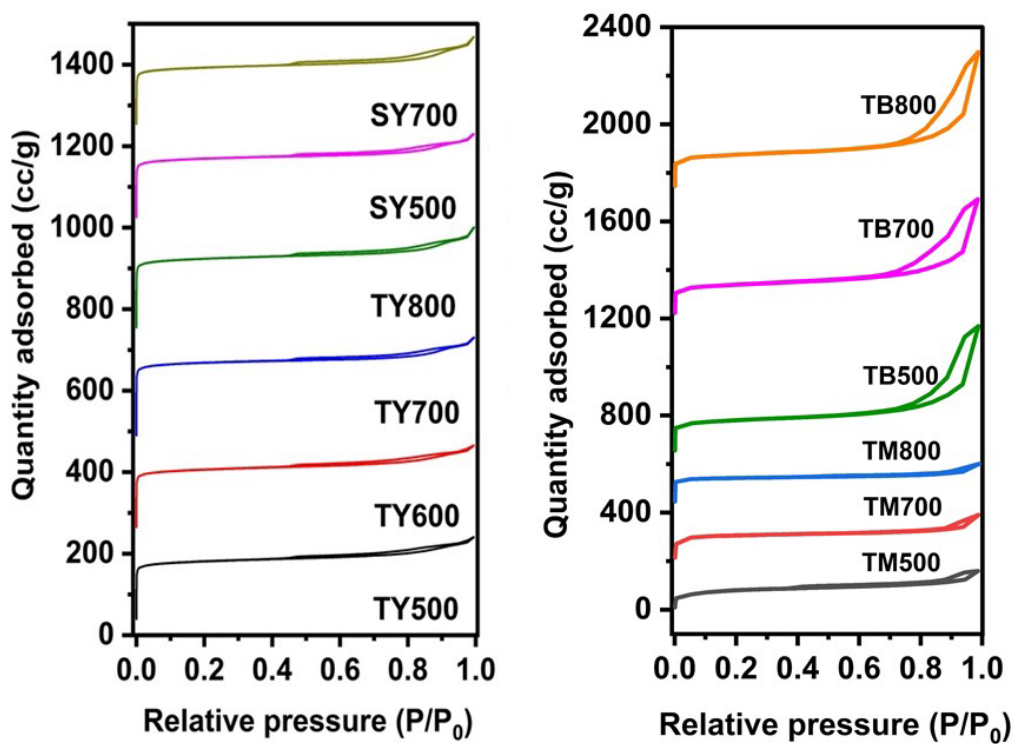

Figure S4: N<sub>2</sub> adsorption isotherms of prepared catalysts.

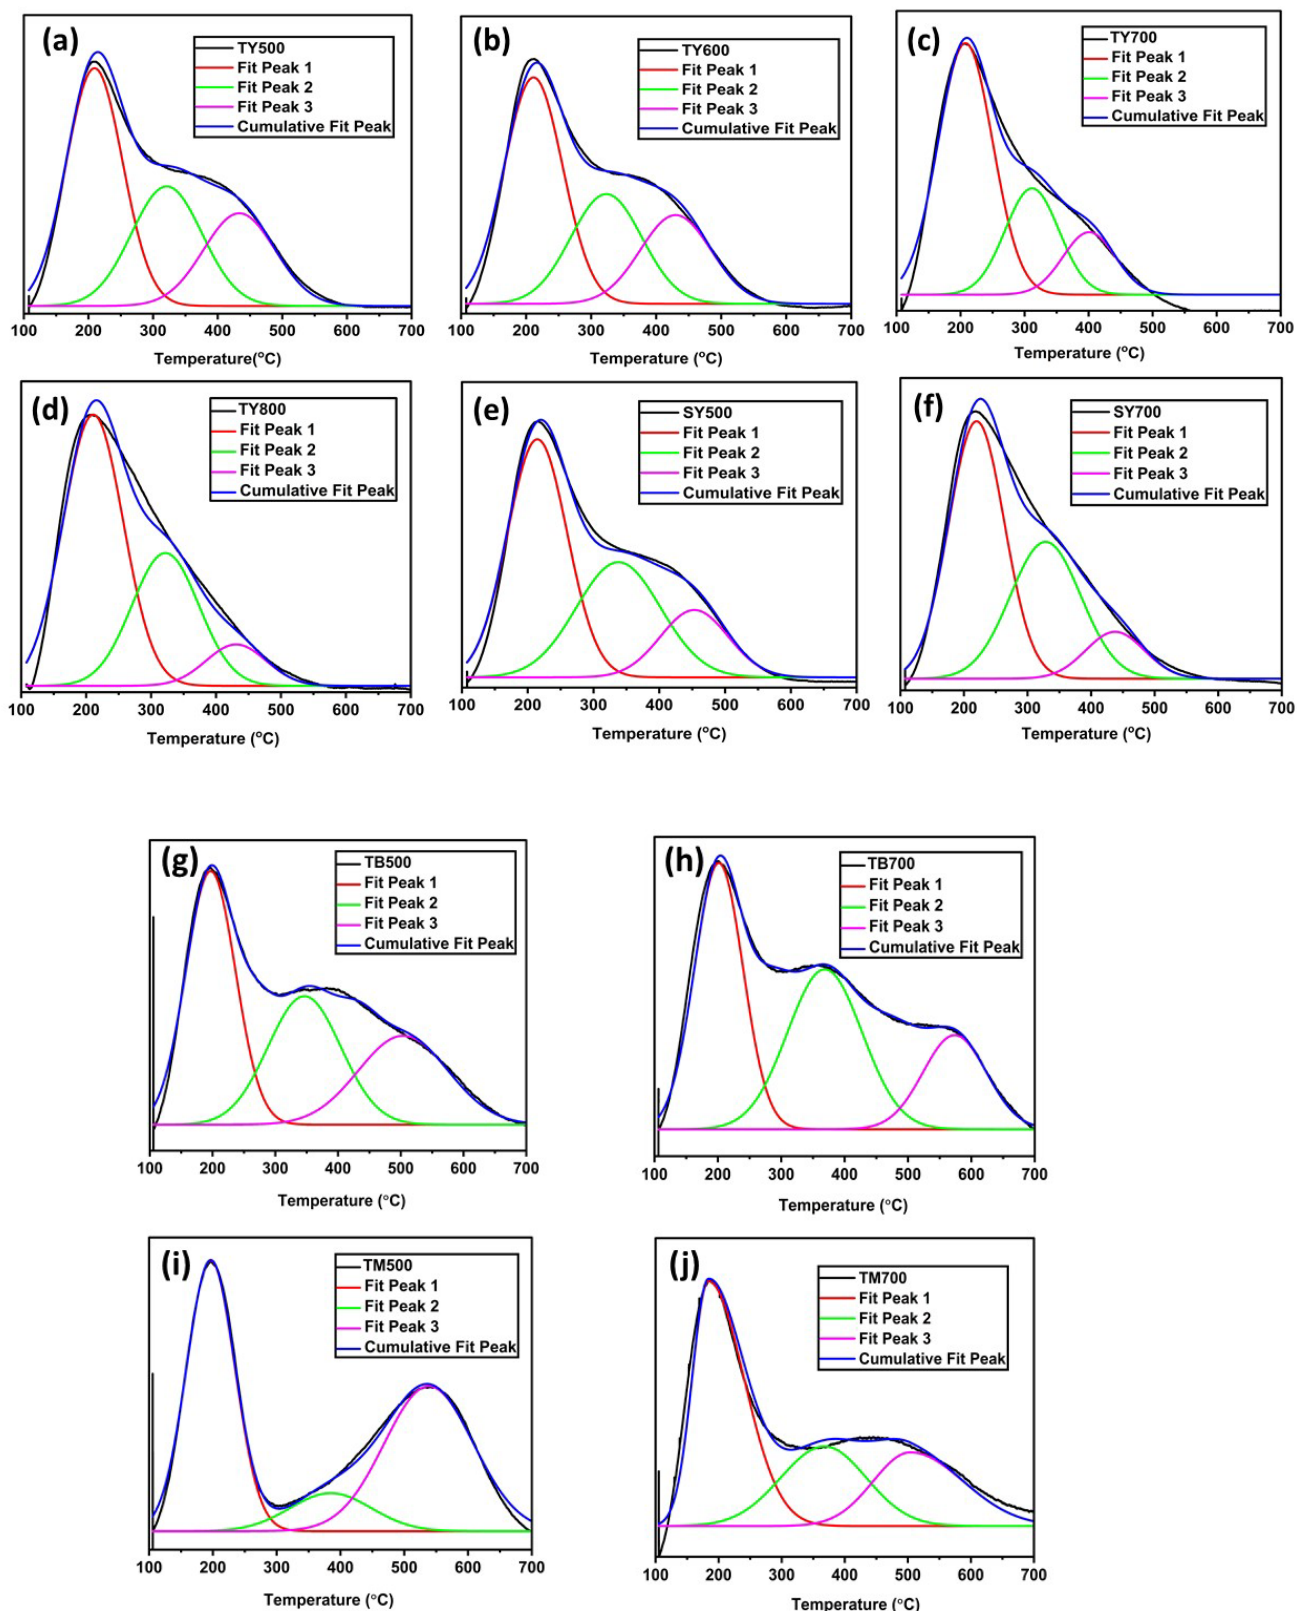

Figure S5: Deconvoluted NH<sub>3</sub>-TPD profiles of (a) TY500 (b) TY600 (c) TY700 (d) TY800 (e) SY500 (f) SY700 (g) TB500 (h) TB700 (i) TM500 (j) TM700

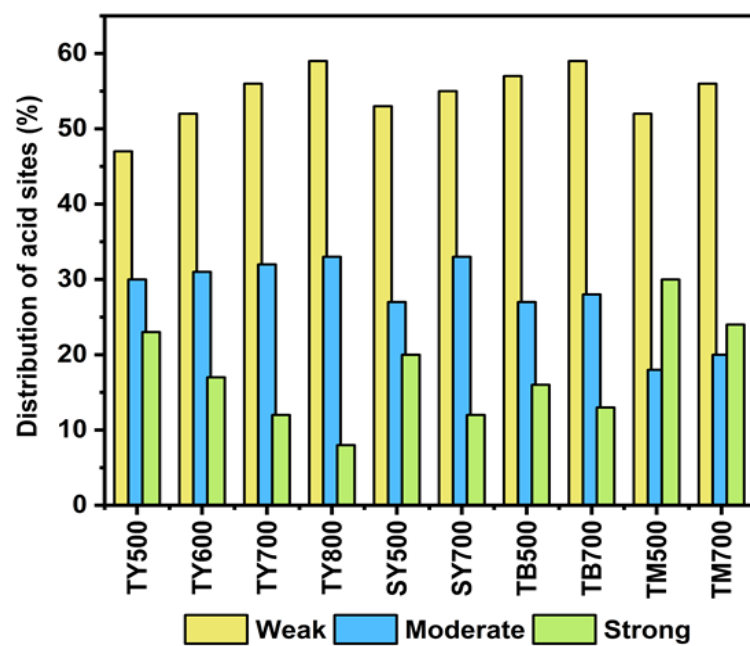

Figure S6. Distribution of weak, moderate & strong acid sites in the prepared catalyst

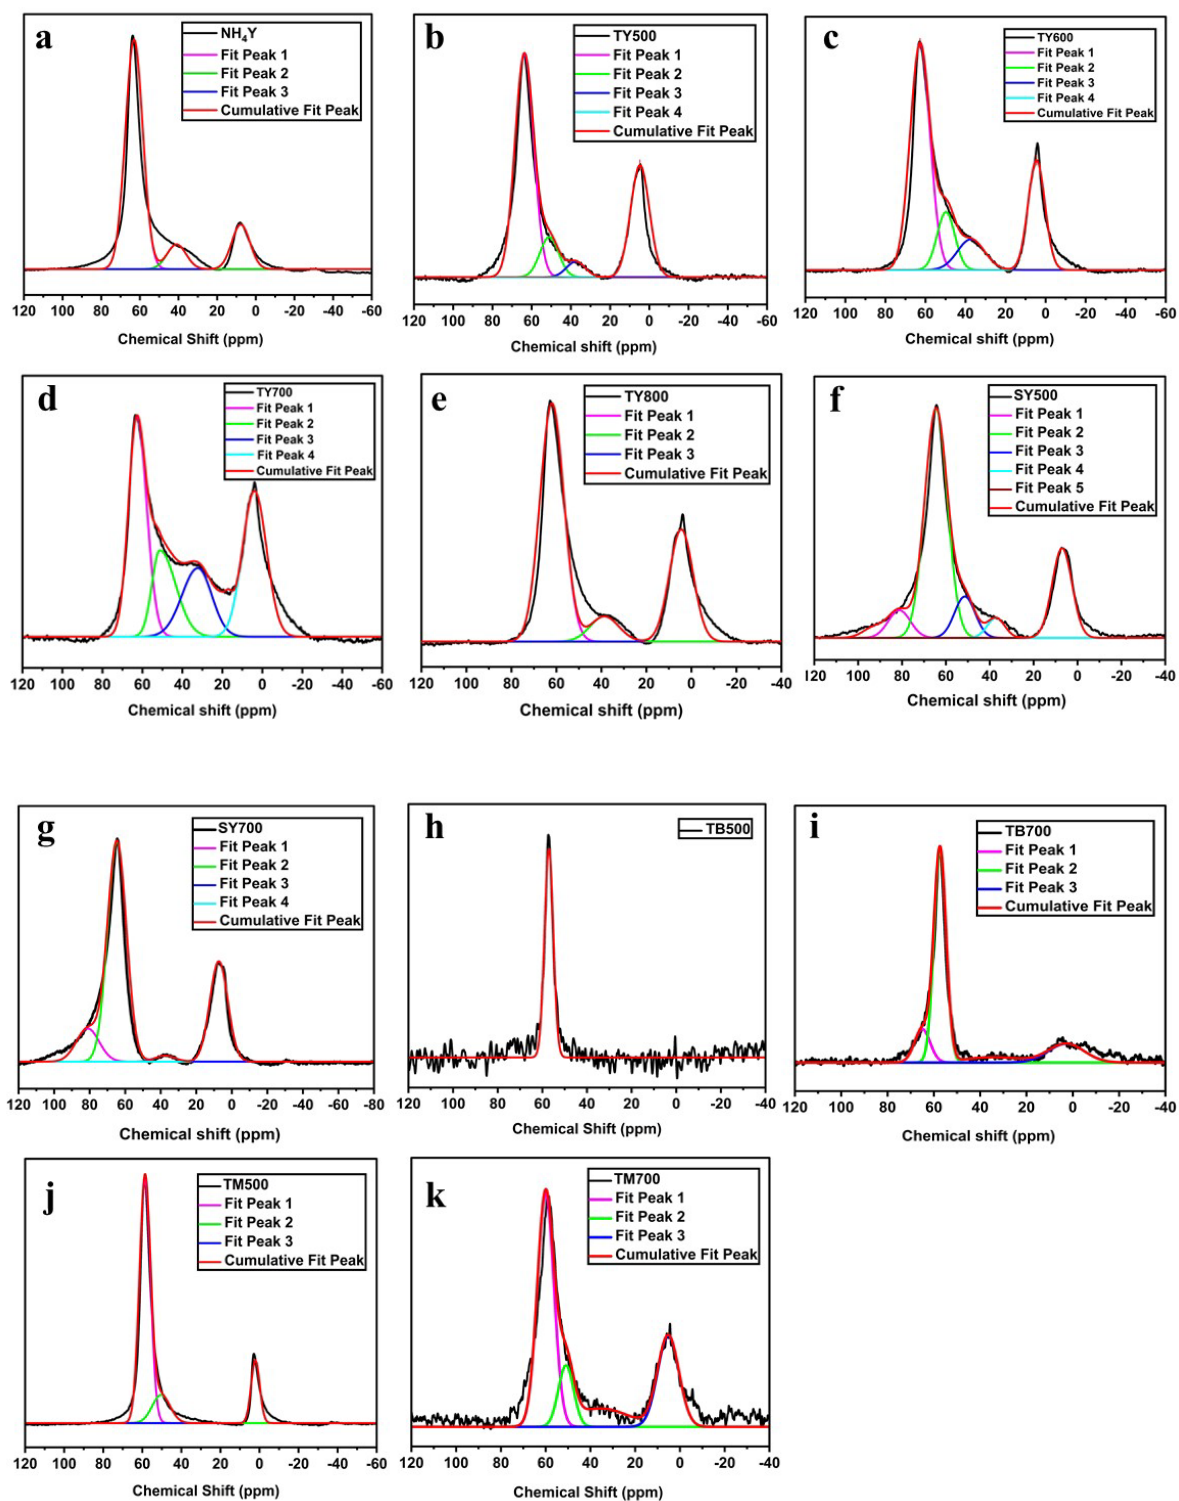

Figure S7: Deconvoluted  $^{27}\text{Al}$  MAS NMR spectra of (a)  $\text{NH}_4\text{Y}$ , (b) TY500 (c) TY600, (d) TY700, (e) TY800, (f) SY500, (g) SY700, (h) TB500, (i) TB700, (j) TM500, (k) TM700

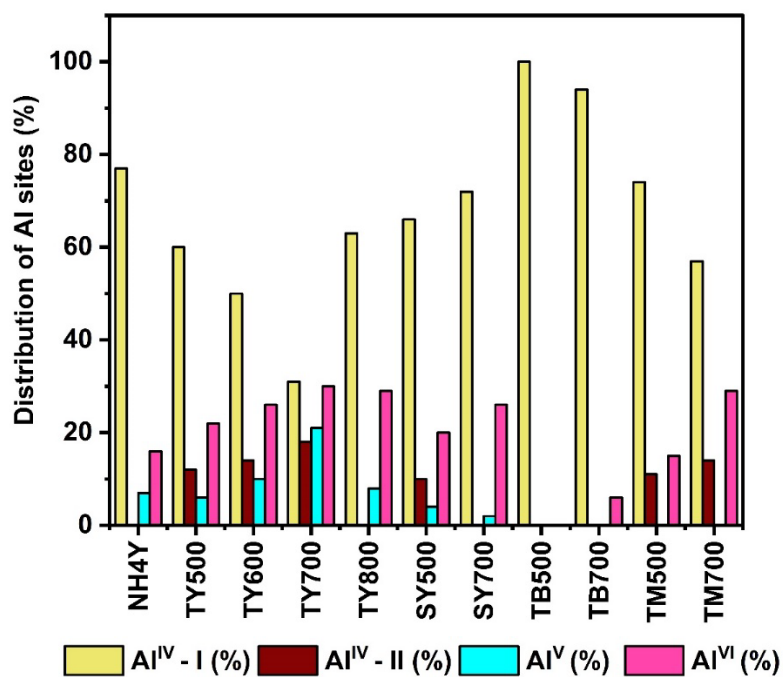

Figure S8: Percentage distribution of the different aluminium sites

**Table S1.** The ratio between tetrahedral aluminium and the sum of penta-coordinated and octahedral aluminium

| Samples           | $(\text{Al}^{\text{IV-I}} + \text{Al}^{\text{IV-II}}) / (\text{Al}^{\text{V}} + \text{Al}^{\text{VI}})$ |
|-------------------|---------------------------------------------------------------------------------------------------------|
| NH <sub>4</sub> Y | 3.34                                                                                                    |
| TY500             | 2.57                                                                                                    |
| TY600             | 1.77                                                                                                    |
| TY700             | 0.96                                                                                                    |
| TY800             | 1.70                                                                                                    |
| SY500             | 3.16                                                                                                    |
| SY700             | 2.57                                                                                                    |
| TB500             | 0                                                                                                       |
| TB700             | 15.6                                                                                                    |
| TM500             | 5.66                                                                                                    |
| TM700             | 2.53                                                                                                    |



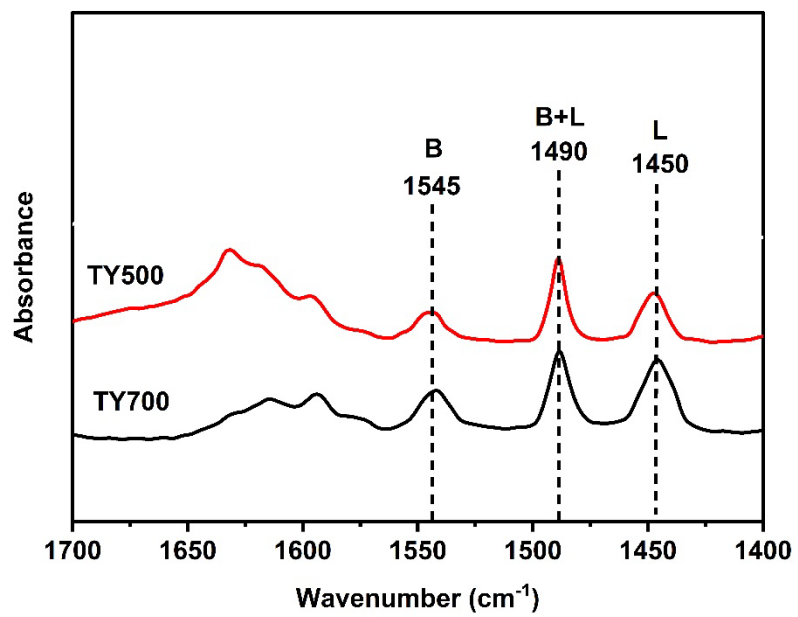

Figure S9: Pyridine adsorption-FTIR spectrum of TY500 and TY700

**Supporting data available in the following link:**

**<https://drive.google.com/drive/folders/1p0N6GfYSTog8Qc40J9ng3uLMWYpfAc9b?usp=sharing>**
